# Supplementary material
Source: publisher figshare collection journal article supplement (https://acs.figshare.com/ndownloader/files/13549733)
Supplement: Supplementary file 1 [file 13549733]

## Sheet: Sheet1
RBP name in this work	source organism name, protein	source organism gene	source organism refseq	wt aa seq	changes from wt (and references)	aa seq used in this work	nt seq used in this work
MCP	Escherichia virus MS2	cp	NC_001417.2	MASNFTQFVLVDNGGTGDVTVAPSNFANGVAEWISSNSRSQAYKVTCSVRQSSAQNRKYTIKVEVPKVATQTVGGVELPVAAWRSYLNMELTIPIFATNSDCELIVKAMQGLLKDGNPIPSAIAANSGIY	delF-G [1] V29I [1] taken from addgene plasmid 27121	MASNFTQFVLVDNGGTGDVTVAPSNFANGIAEWISSNSRSQAYKVTCSVRQSSAQNRKYTIKVEVPKGAWRSYLNMELTIPIFATNSDCELIVKAMQGLLKDGNPIPSAIAANSGIY	ATGGCTTCTAACTTTACTCAGTTCGTTCTCGTCGACAATGGCGGAACTGGCGACGTGACTGTCGCCCCAAGCAACTTCGCTAACGGGATCGCTGAATGGATCAGCTCTAACTCGCGTTCACAGGCTTACAAAGTAACCTGTAGCGTTCGTCAGAGCTCTGCGCAGAATCGCAAATACACCATCAAAGTCGAGGTGCCTAAAGGCGCCTGGCGTTCGTACTTAAATATGGAACTAACCATTCCAATTTTCGCCACGAATTCCGACTGCGAGCTTATTGTTAAGGCAATGCAAGGTCTCCTAAAAGATGGAAACCCGATTCCCTCAGCAATCGCAGCAAACTCCGGCATCTAC
PCP	Pseudomonas phage PP7	cp	NC_001628.1	MSKTIVLSVGEATRTLTEIQSTADRQIFEEKVGPLVGRLRLTASLRQNGAKTAYRVNLKLDQADVVDCSTSVCGELPKVRYTQVWSHDVTIVANSTEASRKSLYDLTKSLVATSQVEDLVVNLVPLGR	delF-G [2] taken from addgene plasmid 40650	MLASKTIVLSVGEATRTLTEIQSTADRQIFEEKVGPLVGRLRLTASLRQNGAKTAYRVNLKLDQADVVDSGLPKVRYTQVWSHDVTIVANSTEASRKSLYDLTKSLVATSQVEDLVVNLVPLGR	ATGCTAGCCTCCAAAACCATCGTTCTTTCGGTCGGCGAGGCTACTCGCACTCTGACTGAGATCCAGTCCACCGCAGACCGTCAGATCTTCGAAGAGAAGGTCGGGCCTCTGGTGGGTCGGCTGCGCCTCACGGCTTCGCTCCGTCAAAACGGAGCCAAGACCGCGTATCGCGTCAACCTAAAACTGGATCAGGCGGACGTCGTTGATTCCGGACTTCCGAAAGTGCGCTACACTCAGGTATGGTCGCACGACGTGACAATCGTTGCGAATAGCACCGAGGCCTCGCGCAAATCGTTGTACGATTTGACCAAGTCCCTCGTCGCGACCTCGCAGGTCGAAGATCTTGTCGTCAACCTTGTGCCGCTGGGCCGT
QCP	Enterobacteria phage Qbeta	major coat protein	NC_001890.1 Note: the wt RNA binding site described in the literature [3,4] does not appear in this genome, but does appear in many substrains, e.g. Qbeta strain BZ1 (FJ483844.1).	MAKLQAITLSGIGKNGDVTLNLNPRGVNPTNGVAALSEAGAVPALEKRVTISVSQPSRNRKNYKVQVKIQNPTSCTASGTCDPSVTRSAYADVTFSFTQYSTDEERALVRTELKALLADPMLIDAIDNLNPAY	ordered from Genescript (codon-optimized, probably not necessary)	MAKLQAITLSGIGKNGDVTLNLNPRGVNPTNGVAALSEAGAVPALEKRVTISVSQPSRNRKNYKVQVKIQNPTSCTASGTCDPSVTRSAYADVTFSFTQYSTDEERALVRTELKALLADPMLIDAIDNLNPAY	ATGGCAAAACTTCAGGCAATTACGTTAAGTGGTATCGGTAAGAACGGTGATGTCACCTTGAATTTGAACCCTCGTGGCGTCAACCCGACGAATGGTGTGGCTGCGCTGAGTGAAGCGGGCGCGGTGCCTGCTTTGGAAAAACGTGTCACGATCTCTGTCTCTCAACCGAGCCGTAATCGTAAAAACTATAAAGTACAGGTCAAGATCCAAAATCCTACCAGCTGCACGGCATCCGGCACGTGCGATCCGAGCGTGACGCGTTCCGCGTATGCGGATGTCACGTTTAGTTTCACGCAATATAGTACCGATGAAGAACGCGCACTGGTTCGCACGGAACTTAAAGCCCTTTTGGCTGATCCGATGCTGATTGATGCGATCGATAACCTGAATCCTGCCTAT
GCP	Enterobacteria phage GA	cp	NC_001426.1	MATLRSFVLVDNGGTGNVTVVPVSNANGVAEWLSNNSRSQAYRVTASYRASGADKRKYAIKLEVPKIVTQVVNGVELPGSAWKAYASIDLTIPIFAATDDVTVISKSLAGLFKVGNPIAEAISSQSGFYA	ordered from IDT	MATLRSFVLVDNGGTGNVTVVPVSNANGVAEWLSNNSRSQAYRVTASYRASGADKRKYAIKLEVPKIVTQVVNGVELPGSAWKAYASIDLTIPIFAATDDVTVISKSLAGLFKVGNPIAEAISSQSGFYA	ATGGCAACTTTACGCAGTTTCGTACTCGTCGATAATGGCGGTACGGGGAATGTTACTGTCGTTCCTGTTAGCAATGCCAACGGCGTCGCTGAGTGGCTTTCTAATAACTCGCGCAGTCAGGCTTATCGCGTGACTGCCAGTTATCGTGCGTCAGGCGCGGACAAGCGCAAATATGCCATTAAACTTGAAGTACCGAAAATCGTTACCCAAGTTGTAAATGGTGTTGAGCTGCCTGGTTCCGCATGGAAGGCTTATGCCTCTATCGACCTGACCATCCCTATCTTTGCTGCAACCGACGACGTGACTGTTATTTCCAAGTCGCTCGCCGGCCTGTTCAAAGTTGGGAACCCTATCGCTGAAGCTATCTCTTCACAGAGTGGCTTCTACGCG
References:
1. Peabody and Ely, Nucleic Acids Research 20 (7), 1992
2. Chao et al. , Nature Structural and Molecular Biology 15 (1), 2008
3. Witherell and Uhlenbeck, Biochemistry 28, 1989.
4. Lim et al., Journal of Biological Chemistry 271 (50), 1996.
